# Supplementary material for: An updated evaluation of serum sHER2, CA15.3, and CEA levels as biomarkers for the response of patients with metastatic breast cancer to trastuzumab-based therapies
Source: PLoS One. 2020 Jan 7;15(1):e0227356. doi: 10.1371/journal.pone.0227356 (PMC6946590; doi:10.1371/journal.pone.0227356)
Supplement: S1 Dataset — (XLSX) [file pone.0227356.s001.xlsx]

## Sheet: S1_Dataset
n°	N°id.pat.	Age	days	P105	Ratioj30/j0	100-ratio	EGFR	CA15-3(U/mL)	100-ratio	CEA(ng/ml)	100-ratio	DNA	IHC	FISH	FISH	ADNser	Metastatic sites	Number of metastatic sites	ER	PR	Menopause	Age Menopause	THS	Response RECIST Day 90
92	EM004	62	0	17	41	59	44	36	-50	5	92		3			1.6	GANGLION	1	1	1	1	50	0	RP
164	EM004		30	7				54		0
163	EM007	62	0	772	17	83	198	2154	56	37.1	-40	14	3	30	1	2.8	LUNG	2	0	0	1	50	0	S
165	EM007		30	129				952		61							BONE
304	EM010	54	0	33	87	13		29	18	1.1	19	3.1	3	40	1	1.5	BONE	2	1	0	1	50	0	S
305	EM010		30	29				24		0.9							GANGLION
347	EM012	67	0	34	58	42		94		234			3				LIVER	1	0	0	1	55	1	RP
348	EM012		30	20				36		48
113	PP0204	41	0	20	90	10	84	12	0	0.6	-100		3			1.6	LUNG	2	0	0	0			RC
114	PP0204		30	18			62	12		1.2							GANGLION
115	PP0204		60	12			79	15		0.5
180	PP0204		90	12			82	12.3		0.8
181	PP0204		120	11			69	9.3		0.6
182	PP0204		150	11			54	8.8		0
211	PP0204		180	14			76	10.2		0.5
212	PP0204		210	12			77	9		0.6
255	PP0204		240	13			63	9.4		0.7
256	PP0204		270	14			60	10.1		0.9
257	PP0204		300	16			73	10.1		0.7
306	PP0204		360	18				10.4		0.8
307	PP0204		400	22				12.8		0.9
116	PP0205	65	0	66	68	32	63	33	-9	2.5	-24		3			2.6	LUNG	1	0	0	1	47	0	S
117	PP0205		30	45			53	36		3.1
118	PP0205		60	21			38	32		1.6
119	PP0205		90	8			36	16		0
183	PP0205		110	12			54	31.1		0.8
120	PP0206	61	0	57	51	49	61	58	26	1.7	30	8	3	30	1	1.65	BREAST	3	0	0	1	50	1	RP
121	PP0206		30	29			66	43		1.2							GANGLION
122	PP0206		60	15			49	34		0.8							BONE
123	PP0206		90	13			74	36		1
184	PP0206		120	13			56	31.7		1
185	PP0206		150	12			65	32.1		0.9
186	PP0206		180	13			56	30.5		1.2
213	PP0206		225	14			60	24.6		0.7
214	PP0206		270	12			48	21.8		0.6
258	PP0206		330	17			50	29.6		0.9
127	PP0208	26	0	4180	182	-82	58	1690	-27	253	-53	20	3	50	1	19	LUNG	3	0	0	0			RP
128	PP0208		30	7625			59	2162		388							LIVER
129	PP0208		37	7605				2275		379							BONE
130	PP0208		60	6810			57	1695		302
191	PP0208		90	8600			55	1883		766
192	PP0208		110	7755			52	1976		755
193	PP0208		130	7025			59	1836		1030
194	PP0208		180	5300			49	1758		1825
261	PP0208		240	6065			54	1466		2313
131	PP0209	65	0	18	88	12	53	14	15	0.7	43	10	3			1.6	LUNG	1	0	0	1	42	0	RP
132	PP0209		30	16			85	12		0
133	PP0209		60	14			58	14		0.9
134	PP0209		90	11			83	17		1.1
195	PP0209		120	13			59	15		1
196	PP0209		150	14			75	18		0.9
198	PP0311	65	0	29	45	55	62	18	28	0.8	12	15	3	15	1	1.8	LIVER	1	0	0	1	48	1	RP
217	PP0311		30	13			64	13		0.7
218	PP0311		60	12			71	18		0.6
265	PP0311		90	12			59	18		0.6
266	PP0311		120	12			73	18		0.6
267	PP0311		125	12			63	17		0.6
268	PP0311		150	11			69	15		0.5
312	PP0311		210	10			49	16		0.5
269	PP0312	54	0	27	55	45	39	13	23	1.3	54		3			1.6	LIVER	1	1	1	1	?	1	RP
270	PP0312		30	15			50	10		0.6
271	PP0312		60	13			53	10		0
272	PP0312		90	10			47	9		0
313	PP0312		120	11			53	8		0
314	PP0312		150	12			52	7		0
315	PP0312		180	9				8		0
351	PP0312		210	15				7		0
352	PP0312		270	14				5		0
446	PP0312		330	14
447	PP0312		390	14
448	PP0312		450	15
449	PP0312		500	16
273	PP0313	51	0	59	54	45	48	51	20	6.1	33		3			1.45	LIVER	1	0	0	1	51	0	RP
316	PP0313		30	32			63	41		4.1
317	PP0313		90	15			61	27		0.9
318	PP0313		100	16			61	23		0.7
353	PP0313		130	20				21		0.6
354	PP0313		160	17				21		0.6
355	PP0313		190	17				21		0.5
356	PP0313		210	22				23		0.9
70	PS0101	57	0	20	90	10	44	22	-18	44	14	2.6	3	0	0	1.6	BONE	1	1	1	1	50	1	prog
88	PS0101		30	18				26		38
290	PS0103	62	0	15	66	34	42	11		0.7			3			1.1	GANGLION	2	0	0	1	54	1	RP
292	PS0103		30	10				12		0							BONE
295	PS0103		60	10				17		0.6
302	PS0103		90	11				25		0.7
327	PS0103		120	13				15		0.7
338	PS0103		180	13				13		0.6
34	RG0101	55	0	18	55	45	56	121	56	1.9	53	7	3	30	1	1.7	LIVER	2	1	0	1	45	0	RP
35	RG0101		30	10			49	55		0.9
36	RG0101		60	8			47	39		0.9
76	RG0101		90	8			49	44		0.6
77	RG0101		120	8			49	46		0.7
37	RG0102	38	0	23	58	42	51	12	9	0	0		3			2.05	GANGLION	1	0	0	0			RC
38	RG0102		30	14				11		0
39	RG0102		60	9				11		0.6
78	RG0102		90	11				12		0
79	RG0102		120	10			62	14		0
40	RG0103	62	0	32	100	0	57	108	16	15	-26		3			1.7	GANGLION	4	1	1	1	56	0	prog
41	RG0103		30	33			52	91		19							LIVER
80	RG0103		90	38			58	75		15							BONE
																	PERICARDIUM
42	RG0104	50	0	501	110	-10	56	130	-92	2.2	-130	21	2	50	1	2.7	BONE	4	0	0	1	47	0	prog
43	RG0104		30	554			49	250		5.1							SKIN
81	RG0104		90	815			53	269		6.3							LIVER
																	LUNG
82	RG0105	53	0	16	93	7	50	15	13	10	94	26	3	20	1	1.7	BREAST	2	0	1	1	50	0	RP
83	RG0105		30	15				13		0.6							SKIN
84	RG0105		60	13				12		0
147	RG0105		90	10				11		0
148	RG0105		120	9				12		0
85	RG0106	67	0	132	95	5	51	14		39		65	3	40	1	2.75	LUNG	2	0	0	1	59	1	prog
149	RG0106		30	126			44	18		46							BONE
150	RG0106		60	37			45	21		24
151	RG0106		90	19			45	21		12
152	RG0106		120	20			50	20		8.5
153	RG0107	57	0	10	100	0	66	26	16	2.2	5		3			2.3	GANGLION	2	0	0	1	51	0	RP
154	RG0107		30	12				22		2.1							SKIN
155	RG0107		60	11				25		2.8
219	RG0107		90	14				23		2.2
220	RG0107		120	16				22		2.4
156	RG0108	66	0	25	60	40	56	547	11	4.9	68		3			2.2	BREAST	4	1	1	1	52	1	S
157	RG0108		30	15				488		1.6							GANGLION
221	RG0108		60	31				746		3.4							PLEURA
																	SKIN
158	RG0109	64	0	228	48	52	51	270	69	32	83	28	3	50	1	1.75	PERICARDIUM	4	0	1	1	53	0	RP
159	RG0109		30	62			48	84		5.6							LIVER
222	RG0109		90	9			55	32		1.7							PLEURA
																	BONE
160	RG0110	43	0	32	53	47	65	28	25	4	50		3			1.8	SKIN	2	1	?	0			RC
223	RG0110		30	17			58	21		2							BREAST
224	RG0110		60	10			57	20		0.5
225	RG0110		90	9			58	20		0
226	RG0110		120	9			74	18		0
227	RG0111	64	0	290	77	23	55	243	-22	3.7	30	3	3	20	1	5	LIVER	3	1	?	1	52	0	prog
228	RG0111		30	224			47	298		2.6							PLEURA
																	BONE
229	RG0112	49	0	444	13	87	70	467	72	182	86	18	3	40	1	2.45	LUNG	3	1	0	0			S
230	RG0112		30	57			56	130		26							GANGLION
231	RG0112		60	22			52	55		5.7							BONE
232	RG0112		90	15			53	30		1.6
275	RG0112		120	14			58	24		1
233	RG0113	40	0	64	51	49	50	15	14	77	31	26	3	50	1	1.65	SKIN	2	0	0	0			RP
234	RG0113		30	33			48	13		53							THORAX
235	RG0113		45	13			58	14		24
236	RG0113		70	7			60	11		3.3
276	RG0113		90	7			65	13		1.6
277	RG0113		120	8			58	13		0.5
237	RG0114	62	0	165	39	61	39	2850	50	30	-250	7	3	30	1	2.9	BONE	1	1	1	1	52	0	RP
238	RG0114		30	65			38	1436		107
278	RG0114		60	15			36	289		41
279	RG0114		90	14			37	102		6
280	RG0114		120	11			33	57		2.2
239	RG0115	66	0	161	7	93	76	237	80	910	98	4	2	10	1	5	LUNG	2	1	0	1	53	1	RP
240	RG0115		30	12			58	47		21							LIVER
281	RG0115		60	9			55	29		2
282	RG0115		90	9			61	18		0.6
283	RG0115		120	10			56	13		2.3
241	RG0116	57	0	150	25	75	58	27	34	13.7	59	12	3			2.15	LIVER	1	0	0	1	53	1	RP
284	RG0116		30	37			64	18		5.6
285	RG0116		90	12			58	12		1.3
286	RG0116		120	11			70	11		1.6
274	RG0117	53	0	157	41	59	49	909	39	2	60	7	3	30	1	1.6	LIVER	2	0	1	1	47	0	RP
287	RG0117		30	65			64	553		0.8							BONE
288	RG0117		60	21			57	178		0
289	RG0117		90	17			64	76		0
368	RG0117		120	12				24		0.5
379	RG0121	75	0	14	71	29				0.5			3				THORAX	1	0	0	1	53	0	S
380	RG0121		30	10						0.5
381	RG0121		60	10						0.52
109	SA0203	32	0	13	77	23	41	906	60	1.4	7		2	30	1	1.6	GANGLION	1	1	1	0			RP
145	SA0203		30	10				361		1.3
175	SA0203		90	9				185		0.7
242	SA0203		180	10				59		0
68	SL0002	50	0	17	59	41	79	36	-8	4.3	-9		2	30	1	1.5	LIVER	1	0	0	1	x	0	prog
95	SL0002		30	10				39		4.7
100	SL0002		90	12				42		4.7
87	SL0003	46	0	97	100	0	36	52	-9	89	-57	11	3	20	1	1.6	BONE	2	0	1	1	x	x	prog
99	SL0003		30	99			51	57		140							LIVER
1	TE0101	52	0	19	100/60	0/40	67	177	-137	83	97	2	2	10	1		LIVER	1	1	1	1	48	0	RP
4	TE0101		30	22				420		2.2
6	TE0101		60	12				220		65
12	TE0101		90	10				163		21
21	TE0101		120	13			65	139		17
26	TE0101		140	12				149		21						1.5
45	TE0101		170	13				175		41
49	TE0101		200	14			74	285		80
64	TE0101		250	70			62	1389		958
7	TE0104	65	0	779	22	78	57	89	-6	10.4	0	2	3	30	1		THORAX	4	0	0	1	55	0	RP
10	TE0104		1	504			45	95		10.5							LUNG
15	TE0104		30	114			45	60		10							BONE
25	TE0104		60	28			34	20		10.5							LIVER
30	TE0104		90	42			38	15		4.5
51	TE0104		130	52			43	15		3.1
57	TE0104		160	54			41	13		3
65	TE0104		190	57			36	14		6.6						1.9
103	TE0104		220	113			44	17		3.6
110	TE0104		250	175			40	21		2.8
9	TE0105	60	0	7	114	-14	38					5.6	3			1.65	BREAST	1	1	?	1	54	1	S
11	TE0105		1	12				35		0.8
17	TE0105		30	8				26		0
14	TE0108	58	0	11	100	0	46	23	-21	3.6	24	2	3	<10	1	1.85	LUNG	1	x	x	1	42	0	RP
20	TE0108		0	16				28		2.4
23	TE0108		1	12				25		2
29	TE0108		30	14			53	25		2.1
53	TE0108		90	XX			44	21		0.9
61	TE0108		120	15			59	22		1.7
73	TE0108		150	15			55	24		1.5
94	TE0108		180	16			46	25		1.7
141	TE0108		270	15			57	28		1.2
27	TE0111	68	0	14	94	6	46	1090	-20	10	-20	25	3	20	1	1.6	LIVER	1	1	0	1	x	0	S
28	TE0111		1	14			44	1311		12.1
48	TE0111		30	13			37	1514		11.2
54	TE0111		60	16			67	1908		12.4
63	TE0111		90	15			52	1647		16.9
71	TE0111		120	15			52	1142		11.2
136	TE0111		330	20			56	4130		23.7
47	TE0112	43	0	52	46	54	67	66	23	83	63		3			12.5	LIVER	2	1	0	1	x	0	S
52	TE0112		30	24				51		31							BONE
46	TE0114	56	0	35	48	52	56	71	6	139	1		3			1.6	BONE	2	0	1	1	47	1	S
50	TE0114		1	33			67	67		138							THORAX
58	TE0114		30	16			60	32		47
66	TE0114		60	10			56	31		20
62	TE0118	56	1	43	32	68	49	47	22	4	33		3			2.1	LIVER	1	1	1	1	51	0	S
75	TE0118		30	14			70	37		2.7
97	TE0118		45	12			58	35		1.8
102	TE0118		90	10			63	28		0.9
142	TE0118		140	9			53	26		0.7
386	TE0118		720	29			61
440	TE0118		990	10
67	TE0119	58	0	420	11	89	56	227	-32	2.9	-34	6	3	40	1	1.7	LIVER	1	0	0	1	49	0	RP
72	TE0119		1	663			57	300		3.9
98	TE0119		30	75			49	128		0.6
101	TE0119		60	21			47	49		0
104	TE0119		90	12			46	32		0.5
137	TE0119		110	10			60	22		0.6
139	TE0119		120	12			56	22		0.7
144	TE0119		135	10			73	22		0.5
146	TE0119		150	9			50	23		0.5
167	TE0119		165	10			58	22		0
169	TE0119		175	9			50	23		0
172	TE0119		185	9			56	21		0
174	TE0119		200	9			49	21		0.6
177	TE0119		215	11			62	22		0.9
199	TE0119		235	11			56	20		0.6
203	TE0119		265	12			66	17		0
244	TE0119		300	12			45	14		0
293	TE0119		340	10			62	14		0
303	TE0119		400	10			65	15		0
326	TE0119		430	12			68	15		0
334	TE0119		460	10			82	16		0
339	TE0119		490	14			63	15		0
345	TE0119		510	11			64	16		0
361	TE0119		540	10			68			0
367	TE0119		630	9			66			0
385	TE0119		690	10			66			0
400	TE0119		?	9			67
439	TE0119		870	10
135	TE0124	59	0	320	52	48	66	60	14	1	-60	13	3	50	1		LIVER	1	0	0	1	52	1	S
143	TE0124		1	594			56	52		1.6
161	TE0124		30	308			59	76		2
170	TE0124		60	65			51	91		0.9
173	TE0124		75	45			50	87		1.1
176	TE0124		90	35			51	94		1.7
179	TE0124		105	22			51	77		1
200	TE0124		120	22			54	83		0.6
202	TE0124		150	20			55	44		0.5
243	TE0124		180	17			50	34		1.1
247	TE0124		210	18			60	42		0						12.5
251	TE0124		240	26			59	67		0.5
294	TE0131	59	0	55	60	40	61	202	-4	1.2	-66	2	3	20	1	6.3	LIVER	3	0	0	1	48	1	RP
299	TE0131		30	33			63	212		2.4							BONE
323	TE0131		60	23			49	197		2.5							GANGLION
342	TE0131		90	23			52	100		2.1
349	TE0131		150	16			49	99		4.2
364	TE0131		195	28			54			4.3
366	TE0131		300	22			56			5.8
325	TE0134	59	0	21			54	18		15.5		7	3	30	1		SKIN	2	1	1	1	52	0	S
336	TE0134		30	14			52	16		2.8							GANGLION
341	TE0134		60	17			56	18		1
346	TE0134		90	15			41	20		0.7
363	TE0134		130	14			61
